# Supplementary material for: Safety, Acceptability and Feasibility of Single Dose Rifampicin as Post‐Exposure Chemoprophylaxis for Contacts of Leprosy Patients in Togo: A Mixed Method Sequential Explanatory Study
Source: Preprints.org preprint supplement (doi:10.20944/preprints202409.1821.v1), 2024-09-24
Supplement: Supplementary file 1 [file supplementary]

## Sheet: Feuil1
district	age	sexe	prof	profession	profession_bis	sitmat	niveau	typcont
1	28	1	BARBIER	Artisant	Artisant	2	2	2
1	70	2	CULTIVATEUR	Cultivateur(trice)	Cultivateur(trice)	2	1	3
1	25	2	COMMERCANTE	Revendeur(se)	Ménagère/Revendeur(se)	2	2	3
1	24	1	FERAILLEUR	Artisant	Artisant	2	3	3
1	25	1	APPRENTI COUTURIERE	Artisant	Artisant	1	3	3
1	35	1	CULTIVATEUR	Cultivateur(trice)	Cultivateur(trice)	2	2	1
1	21	1		Cultivateur(trice)	Cultivateur(trice)	1	2	3
1	35	1	CULTIVATEUR	Cultivateur(trice)	Cultivateur(trice)	2	2	2
1	54	1	COMMERCANT	Revendeur(se)	Ménagère/Revendeur(se)	2	3	2
1	40	2	CULTIVATEUR	Cultivateur(trice)	Cultivateur(trice)	2	2	2
1	35	2	CULTIVATEUR	Cultivateur(trice)	Cultivateur(trice)	2	2	3
1	17	1	ELEVE	Enseignant/Eleve	Enseignant/Eleve	1	3	1
1	38	1	CULTIVATEUR	Cultivateur(trice)	Cultivateur(trice)	2	1	3
1	47	1	CULTIVATEUR	Cultivateur(trice)	Cultivateur(trice)	2	2	3
1	6	2		Ménagère	Ménagère/Revendeur(se)	1	2	1
1	45	1	CULTIVATEUR	Cultivateur(trice)	Cultivateur(trice)	2	2	2
1	35	2	MENAGERE	Ménagère	Ménagère/Revendeur(se)	2	2	1
1	18	1	ELEVE	Enseignant/Eleve	Enseignant/Eleve	1	3	1
1	48	1	CULTIVATEUR	Cultivateur(trice)	Cultivateur(trice)	2	2	1
1	55	2	REVENDEUSE	Revendeur(se)	Ménagère/Revendeur(se)	4	2	1
1	72	2	MENAGERE	Ménagère	Ménagère/Revendeur(se)	4	1	3
1	8	2	ELEVE	Enseignant/Eleve	Enseignant/Eleve	1	2	1
1	35	2	COMMERCANTE	Revendeur(se)	Ménagère/Revendeur(se)	2	2	1
1	45	2	COMMERCANTE	Revendeur(se)	Ménagère/Revendeur(se)	2	1	2
1	25	1	Meunier	Artisant	Artisant	1	2	2
1	45	1	ASC	Artisant	Artisant	1	3	2
1	59	1	CULTIVATEUR	Cultivateur(trice)	Cultivateur(trice)	2	3	2
1	52	1	ELECTRICIEN	Artisant	Artisant	2	3	2
1	63	2	CULTIVATRICE	Cultivateur(trice)	Cultivateur(trice)	2	1	3
1	35	1	ASC	Artisant	Artisant	2	3	2
1	35	2	COUTURIERE	Artisant	Artisant	1	2	2
1	33	1	CHAUFFEUR	Artisant	Artisant	2	3	1
1	40	2	COMMERCANTE	Revendeur(se)	Ménagère/Revendeur(se)	2	2	2
4	6	1	ELEVE	Enseignant/Eleve	Enseignant/Eleve	1	2	2
1	25	2	CULTIVATEUR	Cultivateur(trice)	Cultivateur(trice)	2	2	3
1	55	2	CULTIVATRICE	Cultivateur(trice)	Cultivateur(trice)	2	1	2
1	59	2	CULTRIVATRICE	Cultivateur(trice)	Cultivateur(trice)	1	1	1
1	42	1	CULTIVATEUR	Cultivateur(trice)	Cultivateur(trice)	2	3	3
1	20	1	CULTIVATEUR	Cultivateur(trice)	Cultivateur(trice)	2	2	2
1	8	2	ELEVE	Enseignant/Eleve	Enseignant/Eleve	1	2	1
1	18	2	ELEVE	Enseignant/Eleve	Enseignant/Eleve	2	3	1
1	20	2	CULTIVATRICE	Cultivateur(trice)	Cultivateur(trice)	1	1	1
1	59	1	CULTIVATEUR	Cultivateur(trice)	Cultivateur(trice)	2	1	1
1	42	1	CONDUCTEUR DE TAXI MOTO	Artisant	Artisant	2	3	1
1	32	1	CULTIVATEUR	Cultivateur(trice)	Cultivateur(trice)	1	1	1
1	25	1	TISSERON	Artisant	Artisant	2	2	1
1	62	2	CULTIVATRICE	Cultivateur(trice)	Cultivateur(trice)	2	1	1
1	65	2	CULTIVATRICE	Cultivateur(trice)	Cultivateur(trice)	2	1	1
1	50	2	CULTIVATRICE	Cultivateur(trice)	Cultivateur(trice)	2	2	2
1	70	1	CULTIVATEUR	Cultivateur(trice)	Cultivateur(trice)	2	2	1
1	40	1	MACON	Artisant	Artisant	2	1	2
1	45	1	CULTIVATRICE	Cultivateur(trice)	Cultivateur(trice)	2	1	2
1	80	2	CULTIVATRICE	Cultivateur(trice)	Cultivateur(trice)	4	1	2
1	32	2	CULTIVATRICE	Cultivateur(trice)	Cultivateur(trice)	2	2	2
1	35	1	MENUSIERE	Artisant	Artisant	3	3	1
1	70	2	CULTIVATRICE	Cultivateur(trice)	Cultivateur(trice)	4	1	2
1	50	1	CULTIVATEUR	Cultivateur(trice)	Cultivateur(trice)	2	3	2
1	37	2	CULTIVATRICE	Cultivateur(trice)	Cultivateur(trice)	2	2	3
1	83	2	CULTIVATRICE	Cultivateur(trice)	Cultivateur(trice)	4	1	2
2	50	1	CULTIVATEUR	Cultivateur(trice)	Cultivateur(trice)	2	1	1
2	53	2	MENAGE	Revendeur(se)	Ménagère/Revendeur(se)	2	1	2
2	65	2	CULTIVATRICE	Cultivateur(trice)	Cultivateur(trice)	4	1	1
2	32	1	CULTIVATEUR	Cultivateur(trice)	Cultivateur(trice)	2	2	1
2	20	1	MECANICIEN	Artisant	Artisant	2	2	1
2	55	2	CULTIVATEUR	Cultivateur(trice)	Cultivateur(trice)	4	1	1
2	11	2	ELEVE	Enseignant/Eleve	Enseignant/Eleve	1	2	1
2	7	1	ELEVE	Enseignant/Eleve	Enseignant/Eleve	1	2	1
2	9	1	ELEVE	Enseignant/Eleve	Enseignant/Eleve	1	2	1
2	12	2	ELEVE	Enseignant/Eleve	Enseignant/Eleve	1	2	1
2	8	2	ELEVE	Enseignant/Eleve	Enseignant/Eleve	2	2	2
2	8	1	ELEVE	Enseignant/Eleve	Enseignant/Eleve	1	2	1
2	31	2	CULTIVATRICE	Cultivateur(trice)	Cultivateur(trice)	2	3	1
4	37	2	CULTIVATRICE	Cultivateur(trice)	Cultivateur(trice)	2	1	1
4	43	1	CULTIVATEUR	Cultivateur(trice)	Cultivateur(trice)	2	1	3
4	42	1	CULTIVATEUR	Cultivateur(trice)	Cultivateur(trice)	2	2	2
4	20	2	CULTIVATRICE	Cultivateur(trice)	Cultivateur(trice)	2	2	1
1	22	2	CULTIVATRICE	Cultivateur(trice)	Cultivateur(trice)	2	1	3
2	50	2	CULTIVATRICE	Cultivateur(trice)	Cultivateur(trice)	2	1	2
2	32	2	CULTIVATRICE	Cultivateur(trice)	Cultivateur(trice)	2	1	3
2	25	2	CULTIVATRICE	Cultivateur(trice)	Cultivateur(trice)	2	2	2
4	78	2	CULTIVATRICE	Cultivateur(trice)	Cultivateur(trice)	4	1	1
3	9	2	ELEVE	Enseignant/Eleve	Enseignant/Eleve	1	2	1
2	19	1	ELEVE	Enseignant/Eleve	Enseignant/Eleve	1	2	1
4	24	2		Ménagère	Ménagère/Revendeur(se)	1	1	1
4	32	2		Ménagère	Ménagère/Revendeur(se)	1	1	1
4	33	1	CULTIVATEUR	Cultivateur(trice)	Cultivateur(trice)	2	2	2
3	55	2	CULTIVATRICE	Cultivateur(trice)	Cultivateur(trice)	4	1	1
3	59	1	CULTIVATEUR	Cultivateur(trice)	Cultivateur(trice)	2	2	1
1	15	1	ELEVE	Enseignant/Eleve	Enseignant/Eleve	1	2	1
1	15	1	ELEVE	Enseignant/Eleve	Enseignant/Eleve	1	3	2
4	36	2	CULTIVATRICE	Cultivateur(trice)	Cultivateur(trice)	2	1	1
4	14	1	ELEVE	Enseignant/Eleve	Enseignant/Eleve	1	3	1
1	7	2	ELEVE	Enseignant/Eleve	Enseignant/Eleve	1	2	2
3	24	1	ELEVEUR DE PORC	Cultivateur(trice)	Cultivateur(trice)	1	3	2
1	21	1	FERRAILLEUR	Artisant	Artisant	1	3	1
1	32	1	CHAUFFEUR	Artisant	Artisant	2	3	1
1	35	2	COMMERCANTE	Revendeur(se)	Ménagère/Revendeur(se)	2	2	2
1	40	2	MENAGERE	Ménagère	Ménagère/Revendeur(se)	3	1	2
1	10	2	ELEVE	Enseignant/Eleve	Enseignant/Eleve	1	2	3
1	36	1	CULTIVATEUR	Cultivateur(trice)	Cultivateur(trice)	2	2	3
4	40	2	CULTIVATRICE	Cultivateur(trice)	Cultivateur(trice)	2	1	3
1	35	1	CULTIVATEUR	Cultivateur(trice)	Cultivateur(trice)	2	2	1
1	6	2	ELEVE	Enseignant/Eleve	Enseignant/Eleve	1	2	3
4	11	1	ELEVE	Enseignant/Eleve	Enseignant/Eleve	1	2	1
1	47	1	FORGERON	Artisant	Artisant	2	2	2
4	25	2	MENAGERE	Ménagère	Ménagère/Revendeur(se)	2	1	3
4	75	2	CULTIVATRICE	Cultivateur(trice)	Cultivateur(trice)	4	1	2
1	18	2	APPRENTI COUTURIERE	Artisant	Artisant	1	3	3
4	11	1	ELEVE	Enseignant/Eleve	Enseignant/Eleve	1	2	1
3	60	2	MENAGERE	Ménagère	Ménagère/Revendeur(se)	4	1	1
3	20	2	ELEVE	Enseignant/Eleve	Enseignant/Eleve	1	3	1
3	14	2	ELEVE	Enseignant/Eleve	Enseignant/Eleve	1	2	1
4	16	2	ELEVE	Enseignant/Eleve	Enseignant/Eleve	1	3	2
4	30	2	CULTIVATRICE	Cultivateur(trice)	Cultivateur(trice)	2	1	2
4	32	2	CULTIVATRICE	Cultivateur(trice)	Cultivateur(trice)	2	1	2
1	40	1	COMMERCANT	Revendeur(se)	Ménagère/Revendeur(se)	2	3	3
1	40	2	MENAGERE	Ménagère	Ménagère/Revendeur(se)	2	2	3
1	9	1	ELEVE	Enseignant/Eleve	Enseignant/Eleve	1	2	1
1	7	1	ELEVE	Enseignant/Eleve	Enseignant/Eleve	1	2	2
4	45	1	CULTIVATEUR	Cultivateur(trice)	Cultivateur(trice)	2	2	1
4	38	2	CULTIVATRICE	Cultivateur(trice)	Cultivateur(trice)	2	1	2
4	20	2	CULTIVATRICE	Cultivateur(trice)	Cultivateur(trice)	2	2	2
4	12	1	ELEVE	Enseignant/Eleve	Enseignant/Eleve	1	2	1
4	45	1	MENUISIER	Artisant	Artisant	2	2	1
4	6	2	ELEVE	Enseignant/Eleve	Enseignant/Eleve	1	2	2
4	36	2	CULTIVATRICE	Cultivateur(trice)	Cultivateur(trice)	2	1	2
4	38	1	CULTIVATEUR	Cultivateur(trice)	Cultivateur(trice)	2	2	2
4	53	2	CULTIVATRICE	Cultivateur(trice)	Cultivateur(trice)	2	1	1
4	35	2	CULTIVATRICE	Cultivateur(trice)	Cultivateur(trice)	2	2	3
4	41	1	ENSEIGNANT	Enseignant/Eleve	Enseignant/Eleve	2	3	3
4	11	1	ELEVE	Enseignant/Eleve	Enseignant/Eleve	1	2	1
4	60	2	CULTIVATRICE	Cultivateur(trice)	Cultivateur(trice)	2	1	2
4	14	1	ELEVE	Enseignant/Eleve	Enseignant/Eleve	1	2	1
4	31	2	CULTIVATRICE	Cultivateur(trice)	Cultivateur(trice)	2	3	1
1	12	1	ELEVE	Enseignant/Eleve	Enseignant/Eleve	1	3	1
1	13	2	ELEVE	Enseignant/Eleve	Enseignant/Eleve	1	3	3
4	60	2	CULTIVATRICE	Cultivateur(trice)	Cultivateur(trice)	2	1	1
1	30	2	CULTIVATRICE	Cultivateur(trice)	Cultivateur(trice)	2	1	2
1	50	2	CULTIVATRICE	Cultivateur(trice)	Cultivateur(trice)	2	1	2
1	40	2	CULTIVATRICE	Cultivateur(trice)	Cultivateur(trice)	2	2	2
1	6	1		Cultivateur(trice)	Cultivateur(trice)	1	1	1
4	30	1	CLTIVATEUR	Cultivateur(trice)	Cultivateur(trice)	2	2	2
4	17	1	CULTIVATEUR	Cultivateur(trice)	Cultivateur(trice)	1	1	1
2	65	2	CULTIVATEUR	Cultivateur(trice)	Cultivateur(trice)	2	1	1
2	40	1	CULTIVATEUR	Cultivateur(trice)	Cultivateur(trice)	2	2	2
2	45	2	CULTIVATRICE	Cultivateur(trice)	Cultivateur(trice)	2	1	2
2	40	1	MENUISIER	Artisant	Artisant	2	1	2
2	44	1	CULTIVATEUR	Cultivateur(trice)	Cultivateur(trice)	2	1	1
1	27	2	HERBORISTE	Artisant	Artisant	2	3	1
3	28	1	CHAUFFEUR	Artisant	Artisant	2	3	1
3	57	1	CULTIVATEUR	Cultivateur(trice)	Cultivateur(trice)	2	2	1
3	15	2	ELEVE	Enseignant/Eleve	Enseignant/Eleve	1	3	1
3	42	2	REVENDEUSE	Revendeur(se)	Ménagère/Revendeur(se)	2	2	1
1	11	1	ELEVE	Enseignant/Eleve	Enseignant/Eleve	1	2	1
1	37	1	CULTIVATEUR	Cultivateur(trice)	Cultivateur(trice)	2	2	2
1	11	2	ELEVE	Enseignant/Eleve	Enseignant/Eleve	1	2	2
1	10	1	ELEVE	Enseignant/Eleve	Enseignant/Eleve	1	2	2
1	45	1	CULTIVATEUR	Cultivateur(trice)	Cultivateur(trice)	2	2	1
4	38	2	CULTIVATRICE	Cultivateur(trice)	Cultivateur(trice)	2	1	1
4	68	1	CULTIVATEUR	Cultivateur(trice)	Cultivateur(trice)	2	1	2
4	30	2	CULTIVATEUR	Cultivateur(trice)	Cultivateur(trice)	2	1	1
3	6	1	ELEVE	Enseignant/Eleve	Enseignant/Eleve	1	2	1
4	50	2	CULTIVATRICE	Cultivateur(trice)	Cultivateur(trice)	2	2	3
2	45	1	CULTIVATEUR	Cultivateur(trice)	Cultivateur(trice)	2	1	2
2	70	2	CULTIVATEUR	Cultivateur(trice)	Cultivateur(trice)	4	1	2
2	60	1	CULTIVATEUR	Cultivateur(trice)	Cultivateur(trice)	2	1	1
2	5	1	ELEVE	Enseignant/Eleve	Enseignant/Eleve	1	2	1
2	6	1	ELEVE	Enseignant/Eleve	Enseignant/Eleve	1	2	1
2	50	2	CULTIVATRICE	Cultivateur(trice)	Cultivateur(trice)	2	1	1
2	18	2	CULTIVATRICE	Cultivateur(trice)	Cultivateur(trice)	2	3	3
2	29	1	CULTIVATRICE	Cultivateur(trice)	Cultivateur(trice)	1	2	2
2	12	1	ELEVE	Enseignant/Eleve	Enseignant/Eleve	1	2	1
2	8	1	ELEVE	Enseignant/Eleve	Enseignant/Eleve	1	2	1
2	31	1	CULTIVATEUR	Cultivateur(trice)	Cultivateur(trice)	2	2	2
2	5	2		Ménagère	Ménagère/Revendeur(se)	1	1	1
2	7	1	ELEVE	Enseignant/Eleve	Enseignant/Eleve	1	2	1
2	65	1	CULTIVATEUR	Cultivateur(trice)	Cultivateur(trice)	2	1	1
2	35	1	CULTIVATEUR	Cultivateur(trice)	Cultivateur(trice)	1	2	2
2	14	1	ELEVE	Enseignant/Eleve	Enseignant/Eleve	1	3	1
2	20	2	CULTIVATRICE	Cultivateur(trice)	Cultivateur(trice)	2	2	2
2	18	1	CULTIVZTEUR	Cultivateur(trice)	Cultivateur(trice)	1	1	1
4	29	2	COMMERCANTE	Revendeur(se)	Ménagère/Revendeur(se)	2	2	1
4	33	2	CULTIVATEUR	Cultivateur(trice)	Cultivateur(trice)	2	1	1
